# Supplementary material for: New Condensation Polymer Precursors Containing Consecutive Silicon Atoms—Decaisopropoxycyclopentasilane and Dodecaethoxyneopentasilane—And Their Sol–Gel Polymerization
Source: MDPI journal article supplement (doi:10.3390/polym11050841), 2019-05-09
Supplement: s1 [file s1]

## Supplementary Information

# New Condensation Polymer Precursors Containing Consecutive Silicon Atoms, Decaisopropoxycyclopentasilane and Dodecaethoxyneopentasilane, and their Sol-gel Polymerization

Sung Jin Park<sup>1</sup>, Myong Euy Lee<sup>1</sup>, Hyeon Mo Cho<sup>2,\*</sup> and Sangdeok Shim<sup>3</sup>

<sup>1</sup> Department of Chemistry and Medical Chemistry, College of Science and Technology, Research and Education Center for Advanced Silicon Materials, Yonsei University, Wonju, Gangwon-do 26493, South Korea; melgg@yonsei.ac.kr

<sup>2</sup> University College, Yonsei University, Incheon 21983, South Korea

<sup>3</sup> Department of Chemistry, Sunchon National University, Sunchon 57922, South Korea; san90@snu.ac.kr

\* Correspondence: hyeonmo@yonsei.ac.kr

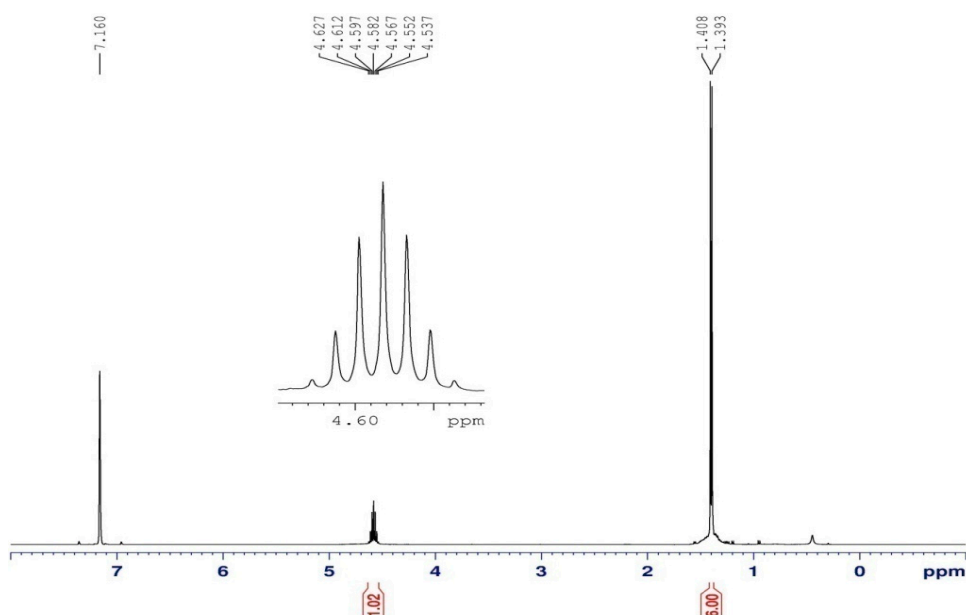

Figure S1. <sup>1</sup>H NMR spectrum of CPS.

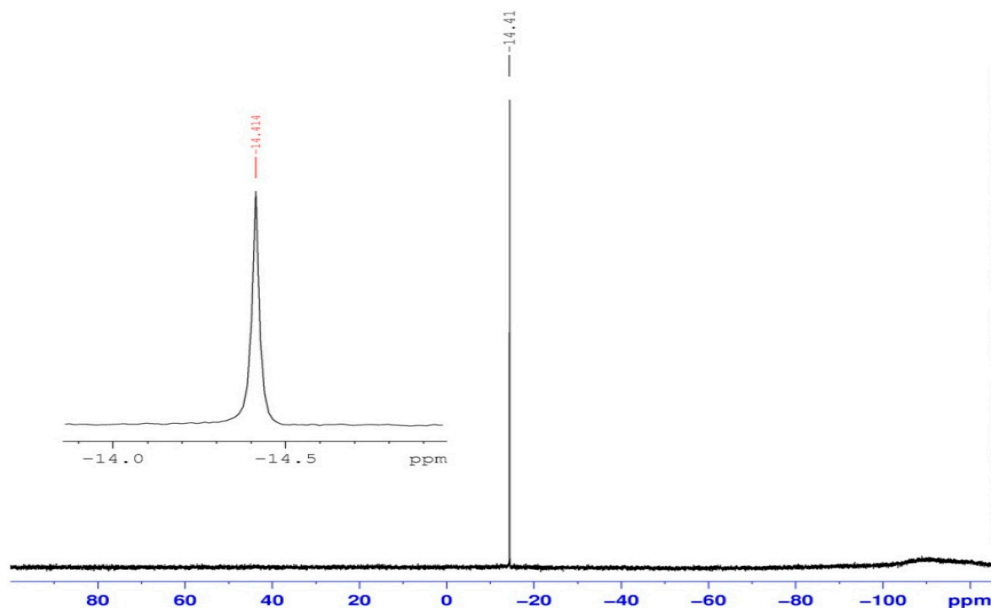

Figure S2.  $^{29}\text{Si}$  NMR spectrum of CPS.

[ Elemental Composition ]

Page: 1

Data : FAB-C315  
 Sample: Dipro  
 Note : m-NBA  
 Inlet : Direct  
 RT : 0.33 min  
 Elements : C 100/0, H 150/0, O 10/0, Si 8/3  
 Mass Tolerance : 1000ppm, 3mmu if m/z < 3, 5mmu if m/z > 5  
 Unsaturation (U.S.) : 0.0 - 100.0

Ion Mode : FAB+  
 Scan#: (1,29)

| Observed m/z | Int% | Err[ppm / mmu] | U.S. | Composition         |
|--------------|------|----------------|------|---------------------|
| 687.3267     | 40.7 | -4.7 / -3.2    | 24.5 | C 46 H 51 Si 3      |
|              |      | +4.4 / +3.0    | 6.5  | C 31 H 59 O 9 Si 4  |
|              |      | -0.2 / -0.1    | 1.5  | C 27 H 63 O 10 Si 5 |
|              |      | +3.8 / +2.6    | 5.5  | C 30 H 63 O 6 Si 6  |
|              |      | -0.8 / -0.5    | 0.5  | C 26 H 67 O 7 Si 7  |
|              |      | +3.2 / +2.2    | 4.5  | C 29 H 67 O 3 Si 8  |

[ Theoretical Ion Distribution ]

Page: 1

Molecular Formula : C<sub>27</sub>H<sub>63</sub>O<sub>10</sub>Si<sub>5</sub>  
 (m/z 687.3268, MW 688.2187, U.S. 1.5)  
 Base Peak : 687.3268, Averaged MW : 688.2116(a), 688.2133(w)

| m/z      | INT.     |       |
|----------|----------|-------|
| 687.3268 | 100.0000 | ***** |
| 688.3284 | 55.7284  | ***** |
| 689.3269 | 33.5308  | ***** |
| 690.3275 | 12.0882  | ***** |
| 691.3266 | 4.1137   | **    |
| 692.3268 | 1.0807   | *     |
| 693.3263 | 0.2596   |       |
| 694.3266 | 0.0525   |       |
| 695.3265 | 0.0096   |       |
| 696.3270 | 0.0015   |       |
| 697.3274 | 0.0002   |       |

Figure S3. HRMS result of CPS.

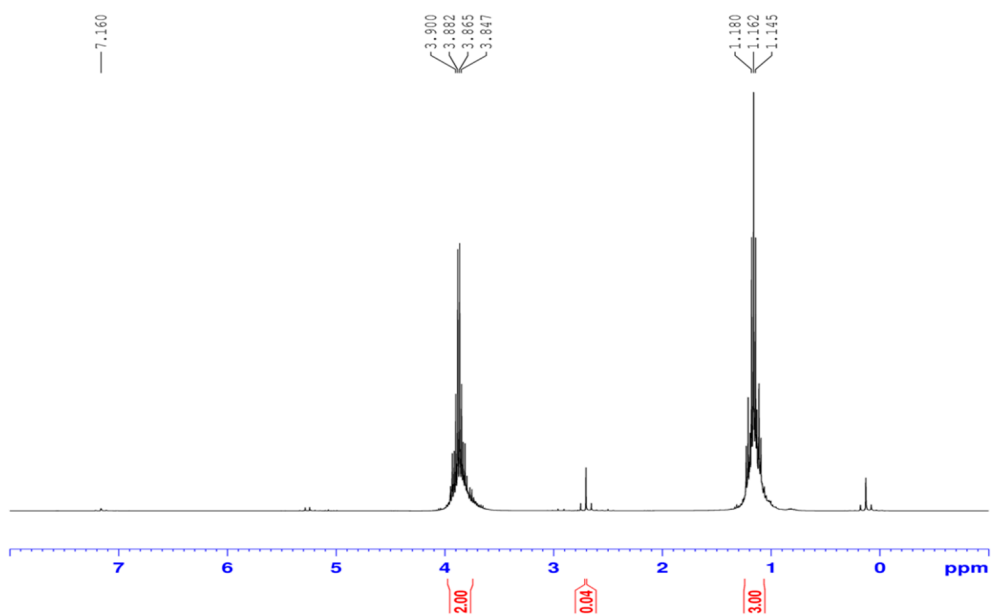

**Figure S4.**  $^1\text{H}$  NMR spectrum of NPS.

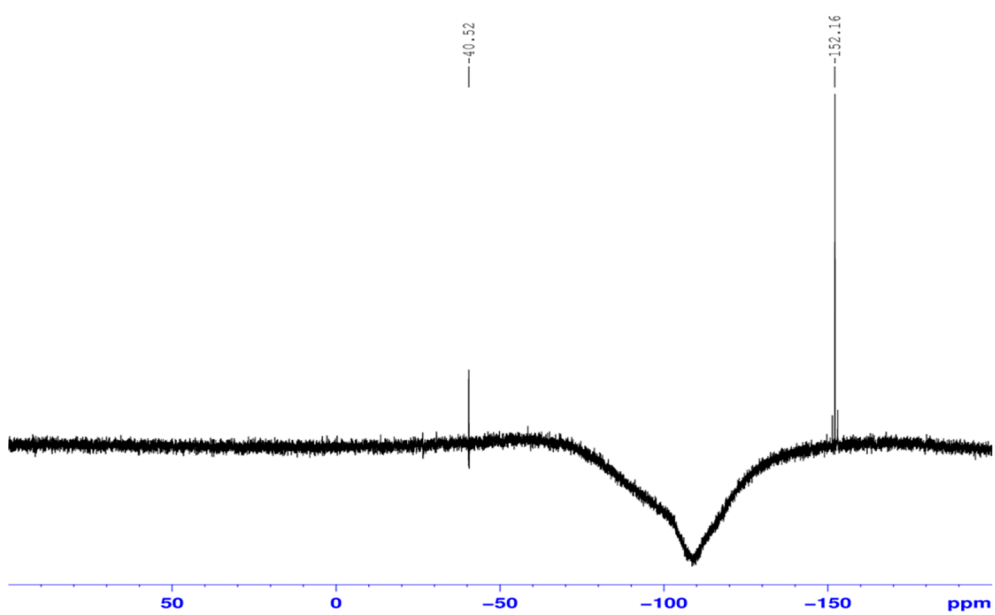

**Figure S5.**  $^{29}\text{Si}$  NMR spectrum of NPS.

[ Elemental Composition ]  
 Data : FAB-H757 Date : 24-Apr-2014 16:50 Page: 1  
 Sample: NPSOEt  
 Note : m-NBA  
 Inlet : Direct Ion Mode : FAB+  
 RT : 0.87 min Scan#: (37,39)  
 Elements : C 150/0, H 150/0, O 15/10, Si 6/4  
 Mass Tolerance : 1000ppm, 3mmu if m/z < 3, 5mmu if m/z > 5  
 Unsaturation (U.S.) : -10.0 - 100.0

| Observed m/z | Int% | Err [ppm / mmu] | U.S. | Composition         |
|--------------|------|-----------------|------|---------------------|
| 681.3030     | 9.5  | +3.0 / +2.0     | -0.5 | C 24 H 61 O 12 Si 5 |
|              |      | -1.6 / -1.1     | -5.5 | C 20 H 65 O 13 Si 6 |

[ Theoretical Ion Distribution ]  
 Molecular Formula : C24 H61 O12 Si5 Page: 1  
 (m/z 681.3009, MW 682.1686, U.S. -0.5)  
 Base Peak : 681.3009, Averaged MW : 682.1614(a), 682.1631(w)

| m/z      | INT.           |
|----------|----------------|
| 681.3009 | 100.0000 ***** |
| 682.3025 | 52.4679 *****  |
| 683.3009 | 32.1864 *****  |
| 684.3015 | 11.2438 *****  |
| 685.3005 | 3.8707 **      |
| 686.3008 | 0.9992 *       |
| 687.3003 | 0.2422         |
| 688.3006 | 0.0486         |
| 689.3006 | 0.0090         |
| 690.3011 | 0.0014         |
| 691.3015 | 0.0002         |

Figure S6. HRMS result of NPS.

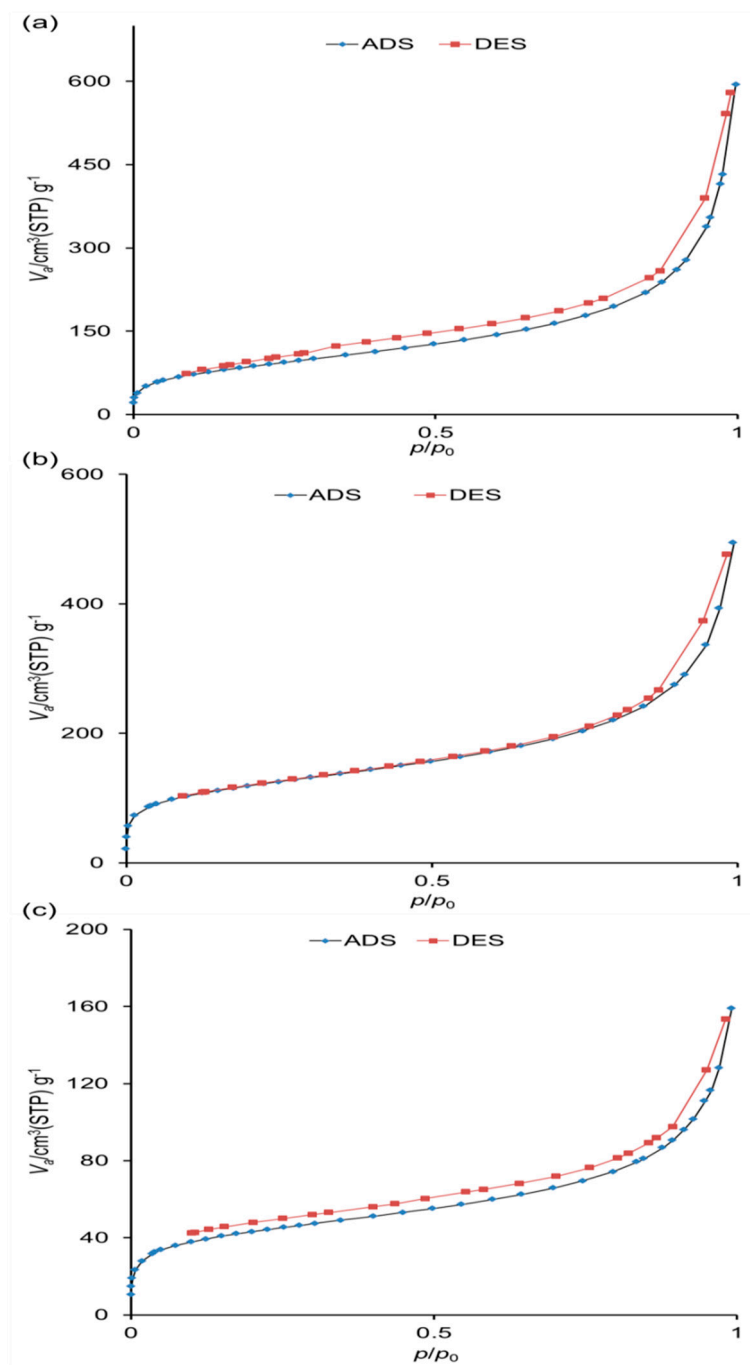

**Figure S7.**  $N_2$  adsorption-desorption isotherms of the **CPS xerogels**. (a) **CPSH**, (b) **CPSOH**, (c) **CPSN**.

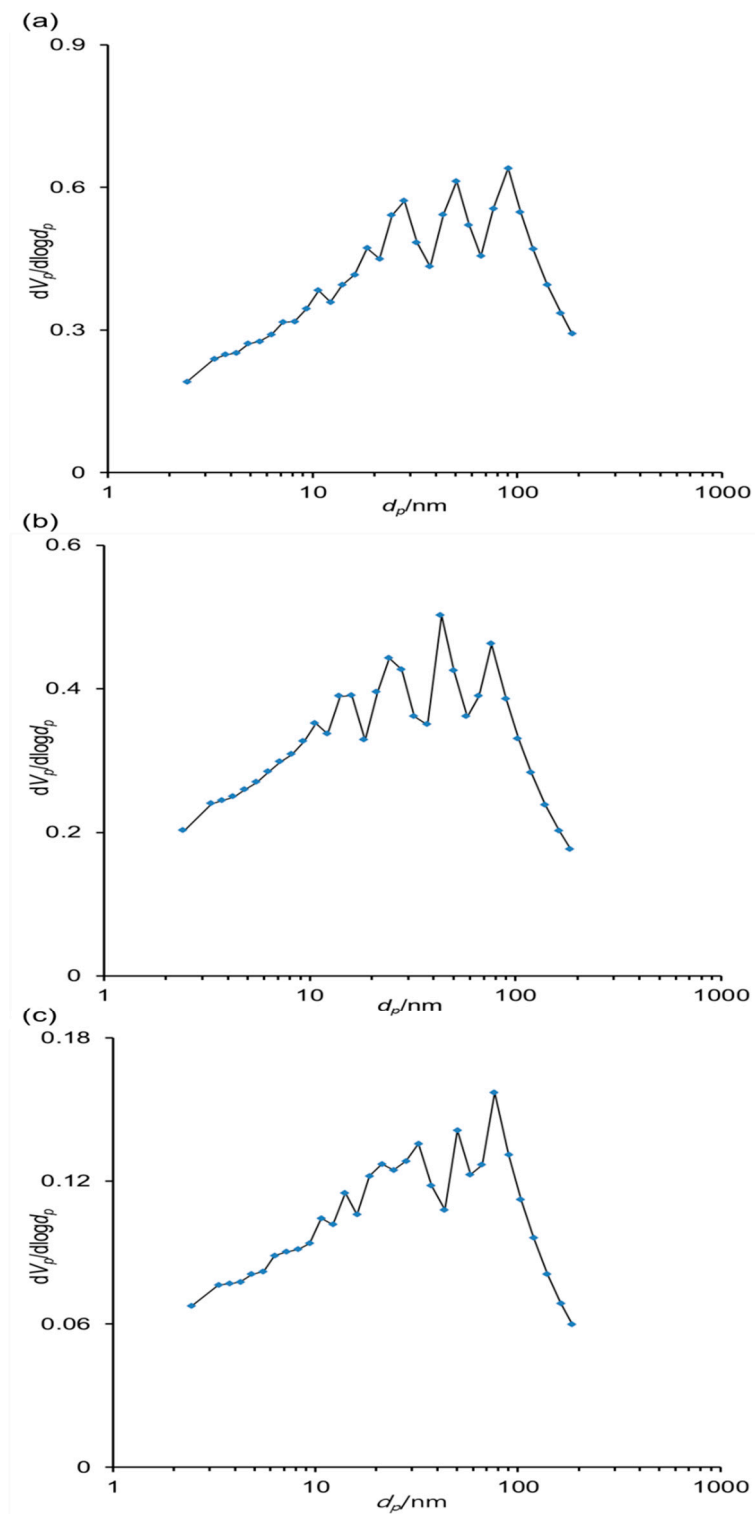

**Figure S8.** Pore size distribution of the **CPS xerogels**. (a) **CPSH**, (b) **CPSOH**, (c) **CPSN**.
